# Supplementary material for: Tumoral glucocorticoids induce a phagocytic CD68+/CD163+/C1Q+ macrophage phenotype primed for IFNγ-driven CXCL9 secretion
Source: Research Square preprint supplement (doi:10.21203/rs.3.rs-6213228/v1), 2025-03-31
Supplement: Supplementary file 1 [file 70d0ebaed12df66e8467c3a0.xlsx]

## Sheet: Tabelle1
Primary antibodies
method	antigen	supplier	Cat#	RRID	dilution
IHC	CD68	abcam	ab955	RRID:AB_307338	1:10000
	CD163	abcam	ab182422	RRID:AB_2753196	1:200
	COX2	cell signaling	12282	RRID:AB_2571729	1:200
	C1QA	Novus Biologicals	NBP1-87492	RRID:AB_11002443	1:400
IC	CD64	abcam	ab288731	RRID: AB_3675762	1:50
	MerTK	abcam	ab300136	RRID:AB_2936858	1:50
	CD163	R&D Systems	AF1607	RRID:AB_354889	1:100
IF	CD68	abcam	ab955	RRID:AB_307338	1:100
	CD163	R&D Systems	AF1607	RRID:AB_354889	1:100
	C1QA	Novus Biologicals	NBP1-87492	RRID:AB_11002443	1:200
Flow	CD64	abcam	ab288731	RRID: AB_3675762	1:100
WB	CD163	cell signaling	25121	RRID: AB_3675763	1:1000
	CD206	cell signaling	91992	RRID:AB_2800175	1:1000
	COX2	cell signaling	12282	RRID:AB_2571729	1:1000
	GR	cell signaling	12041	RRID:AB_2631286	1:1000
	MerTK	abcam	ab52968	RRID:AB_2143584	1:2000
	C1QA	Novus Biologicals	NBP1-87492	RRID:AB_11002443	1:1000
	GAPDH	sigma	G9545	RRID:AB_796208	1:10000
Secondary antibodies
AlexaFluor 555 donkey-anti rabbit IgG (H+L)		Invitrogen	A31572	RRID:AB_162543	1:500
AlexaFluor 488 donkey-anti goat IgG (H+L)		Invitrogen	A11055	RRID:AB_2534102	1:500
AlexaFluor 647 donkey-anti mouse IgG (H+L)		Invitrogen	A31571	RRID:AB_162542	1:1000 (IC)
					1:200 (Flow)
Goat anti-rabbit peroxidase conjugated		Jackson ImmunoResearch	111-035-003	RRID:AB_2313567	1:10000
Goat anti-mouse peroxidase conjugated		Jackson ImmunoResearch	115-035-003	RRID:AB_10015289	1:10000
