# Supplementary material for: Tumoral glucocorticoids induce a phagocytic CD68+/CD163+/C1Q+ macrophage phenotype primed for IFNγ-driven CXCL9 secretion
Source: Research Square preprint supplement (doi:10.21203/rs.3.rs-6213228/v1), 2025-03-31
Supplement: Supplementary file 1 [file 981cb2cc592c5ae58235fa1f.pdf]

# Supplementary methods

## T cell isolation

Human PBMCs from healthy blood donors were isolated by density gradient using Lymphoprep™ (Stemcell). CD8<sup>+</sup> T cells were isolated using the EasySep™ CD8<sup>+</sup> T Cell isolation kit (#17953) and cultured in ImmunoCult™-XF T Cell Expansion medium supplemented with 20 ng/ml IL-2 and 25 µl/ml ImmunoCult™ Human CD3/CD28 activator (all Stemcell)

## Oxylipin measurements in ACC tissues:

Oxylipins and polyunsaturated fatty acids (PUFAs) were measured in ACC tissue samples. NSCLC and CRC tissue samples were analyzed as controls. Frozen tissue samples were weighed into Precellys® 24 homogenization tubes containing ceramic beads (1.4 mm; Bertin P000933-LYSK0A tubes). A cooled mixture of ethanol/phosphate buffer (85:15, v/v) was added at a ratio of 3 µL per 1 mg of tissue. Samples were homogenized using a Precellys 24 tissue homogenizer (RRID:SCR\_022979) at 5,500 rpm for 3 × 30 seconds at 4 °C with 30-second intervals on ice. 30 µL of each tissue homogenate (equivalent to 10 mg of tissue) were transferred to 1.5 mL Eppendorf tubes. Triplicate QC pool samples were prepared by pooling 10 µL from each study sample. The pooled samples were thoroughly mixed, and 30 µL aliquots were transferred to 1.5 mL Eppendorf tubes. All subsequent steps were conducted as described in the LC-MS/MS section.

## Seahorse metabolic phenotyping

At the day of the assay, MΦ were washed with PBS and Seahorse XF RPMI medium, pH 7.4 (Agilent, 103576) supplemented with 2mM L-Glutamine. The metabolic flux was measured using the Agilent Seahorse XFe96 Analyzer (RRID:SCR\_019545) according to the manufacturer's protocol. For the metabolic rate test, the following reagents were injected in sequential order for resulting final concentrations: A) 5 mM Glucose; B) 1.5 µM Oligomycin (Sigma Aldrich, 495455); C) 2.5 µM Bam15 (Sigma Aldrich, SML1760-5MG); D) 50 mM 2-DG (Sigma Aldrich, D8375), 0.5 µM Rotenone/Antimycin A (Sigma Aldrich, R8875/A8674) + 8 µM Hoechst3342 (ThermoFisher, 62249). For the flux assay, 3 baseline measurements were followed by the injection of port A-D, while each injection included 3 measurement cycles. Each measurement cycle consisted of 3 min mixing and 3 min measurement time frames. For normalization, cell counts were measured via Hoechst staining in the Cytation1 with the implemented cell measurement software (Agilent Technologies, Santa Clara, CA, USA). Analysis was conducted in the Seahorse Wave software (RRID:SCR\_014526).

## Viability assay

NCI-H295R, JIL-2266 or CD8<sup>+</sup> T cells were seeded into black 96-well plate with clear bottom at a density of  $2.5 \times 10^4$  cells/well,  $1.5 \times 10^4$  cells/well or  $1 \times 10^4$  cells/well, respectively. At the end of the treatment duration, cell viability was detected using CellTiter Glo Assay (Promega) according to the manufacturer's instruction.

# Table S1

Table 1: List of antibodies used for IHC, IC, IF, Flow and WB

| Primary antibodies                          |         |                        |             |                  |                             |
|---------------------------------------------|---------|------------------------|-------------|------------------|-----------------------------|
| method                                      | antigen | supplier               | Cat#        | RRID             | dilution                    |
| IHC                                         | CD68    | abcam                  | ab955       | RRID:AB_307338   | 1:10000                     |
|                                             | CD163   | abcam                  | ab182422    | RRID:AB_2753196  | 1:200                       |
|                                             | COX2    | cell signaling         | 12282       | RRID:AB_2571729  | 1:200                       |
|                                             | C1QA    | Novus Biologicals      | NBP1-87492  | RRID:AB_11002443 | 1:400                       |
| IC                                          | CD64    | abcam                  | ab288731    | RRID:AB_3675762  | 1:50                        |
|                                             | MerTK   | abcam                  | ab300136    | RRID:AB_2936858  | 1:50                        |
|                                             | CD163   | R&D Systems            | AF1607      | RRID:AB_354889   | 1:100                       |
| IF                                          | CD68    | abcam                  | ab955       | RRID:AB_307338   | 1:100                       |
|                                             | CD163   | R&D Systems            | AF1607      | RRID:AB_354889   | 1:100                       |
|                                             | C1QA    | Novus Biologicals      | NBP1-87492  | RRID:AB_11002443 | 1:200                       |
| Flow                                        | CD64    | abcam                  | ab288731    | RRID:AB_3675762  | 1:100                       |
| WB                                          | CD163   | cell signaling         | 25121       | RRID:AB_3675763  | 1:1000                      |
|                                             | CD206   | cell signaling         | 91992       | RRID:AB_2800175  | 1:1000                      |
|                                             | COX2    | cell signaling         | 12282       | RRID:AB_2571729  | 1:1000                      |
|                                             | GR      | cell signaling         | 12041       | RRID:AB_2631286  | 1:1000                      |
|                                             | MerTK   | abcam                  | ab52968     | RRID:AB_2143584  | 1:2000                      |
|                                             | C1QA    | Novus Biologicals      | NBP1-87492  | RRID:AB_11002443 | 1:1000                      |
|                                             | GAPDH   | sigma                  | G9545       | RRID:AB_796208   | 1:10000                     |
| Secondary antibodies                        |         |                        |             |                  |                             |
| AlexaFluor 555 donkey-anti rabbit IgG (H+L) |         | Invitrogen             | A31572      | RRID:AB_162543   | 1:500                       |
| AlexaFluor 488 donkey-anti goat IgG (H+L)   |         | Invitrogen             | A11055      | RRID:AB_2534102  | 1:500                       |
| AlexaFluor 647 donkey-anti mouse IgG (H+L)  |         | Invitrogen             | A31571      | RRID:AB_162542   | 1:1000 (IC)<br>1:200 (Flow) |
| Goat anti-rabbit peroxidase conjugated      |         | Jackson ImmunoResearch | 111-035-003 | RRID:AB_2313567  | 1:10000                     |
| Goat anti-mouse peroxidase conjugated       |         | Jackson ImmunoResearch | 115-035-003 | RRID:AB_10015289 | 1:10000                     |

Figure S1

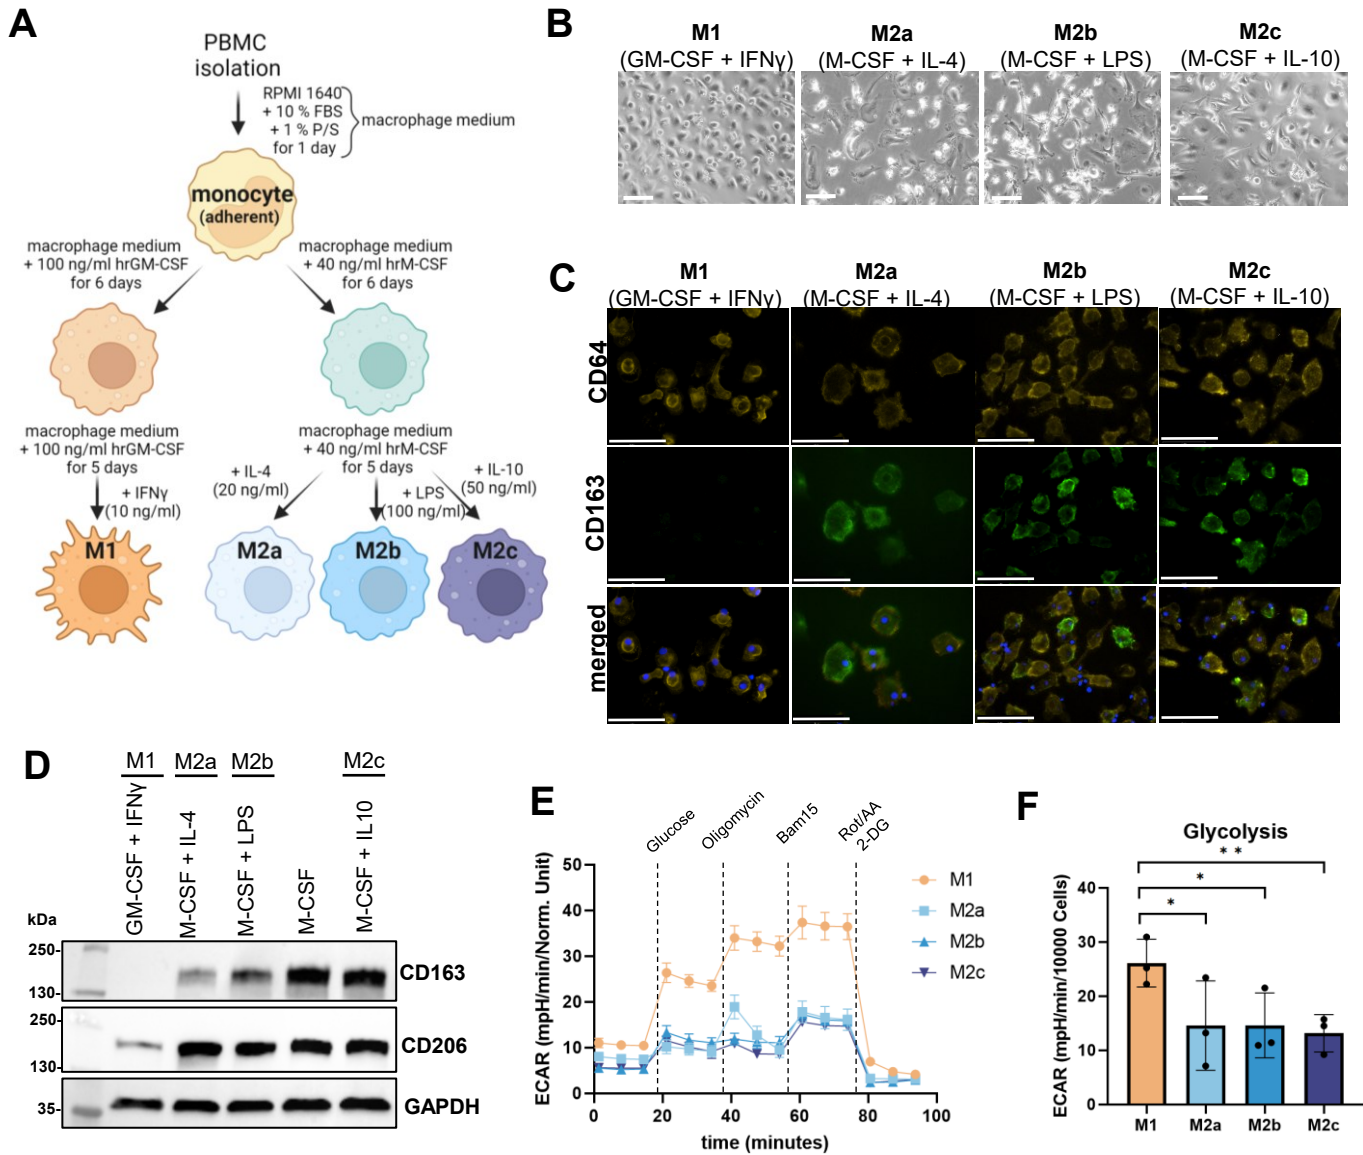

Figure S2

A

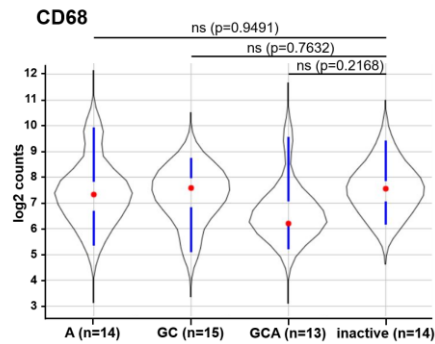

B

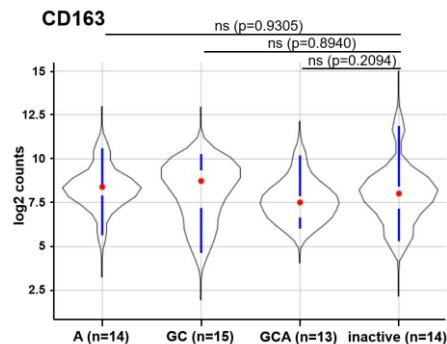

C

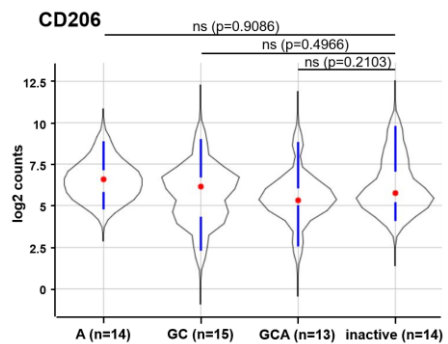

Figure S3

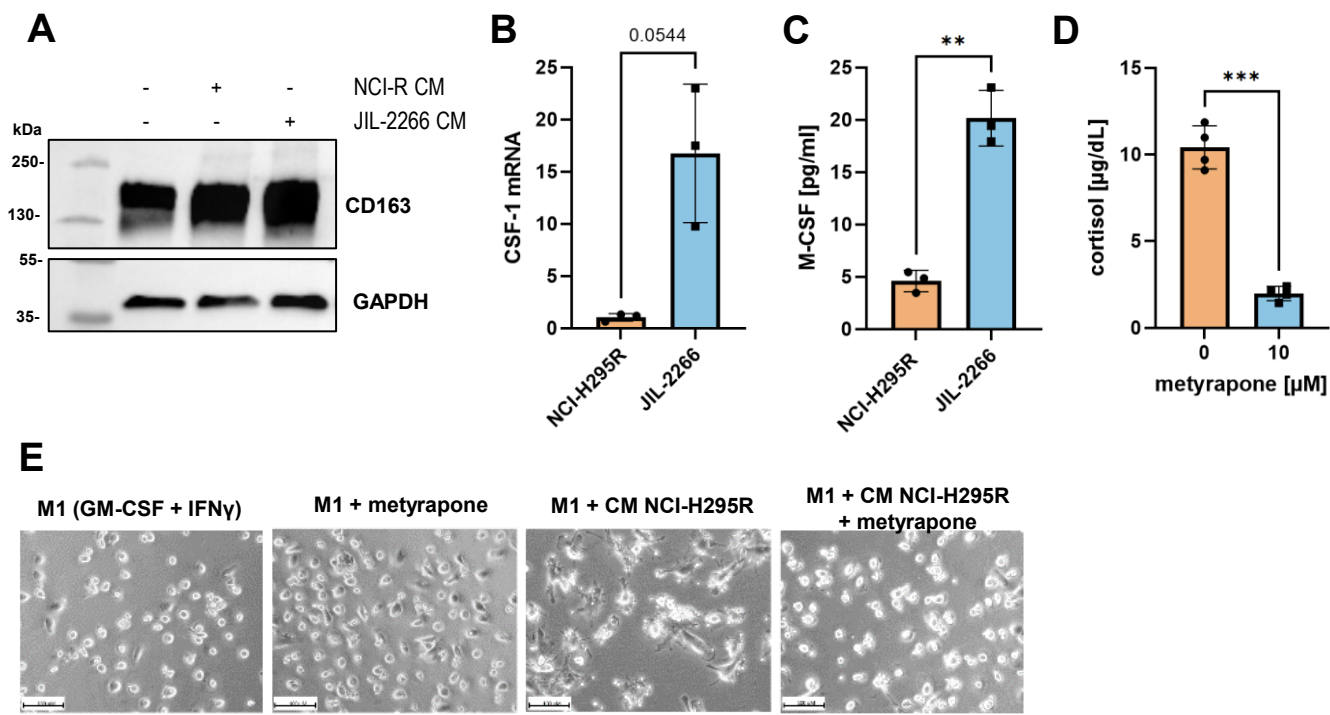

Figure S4

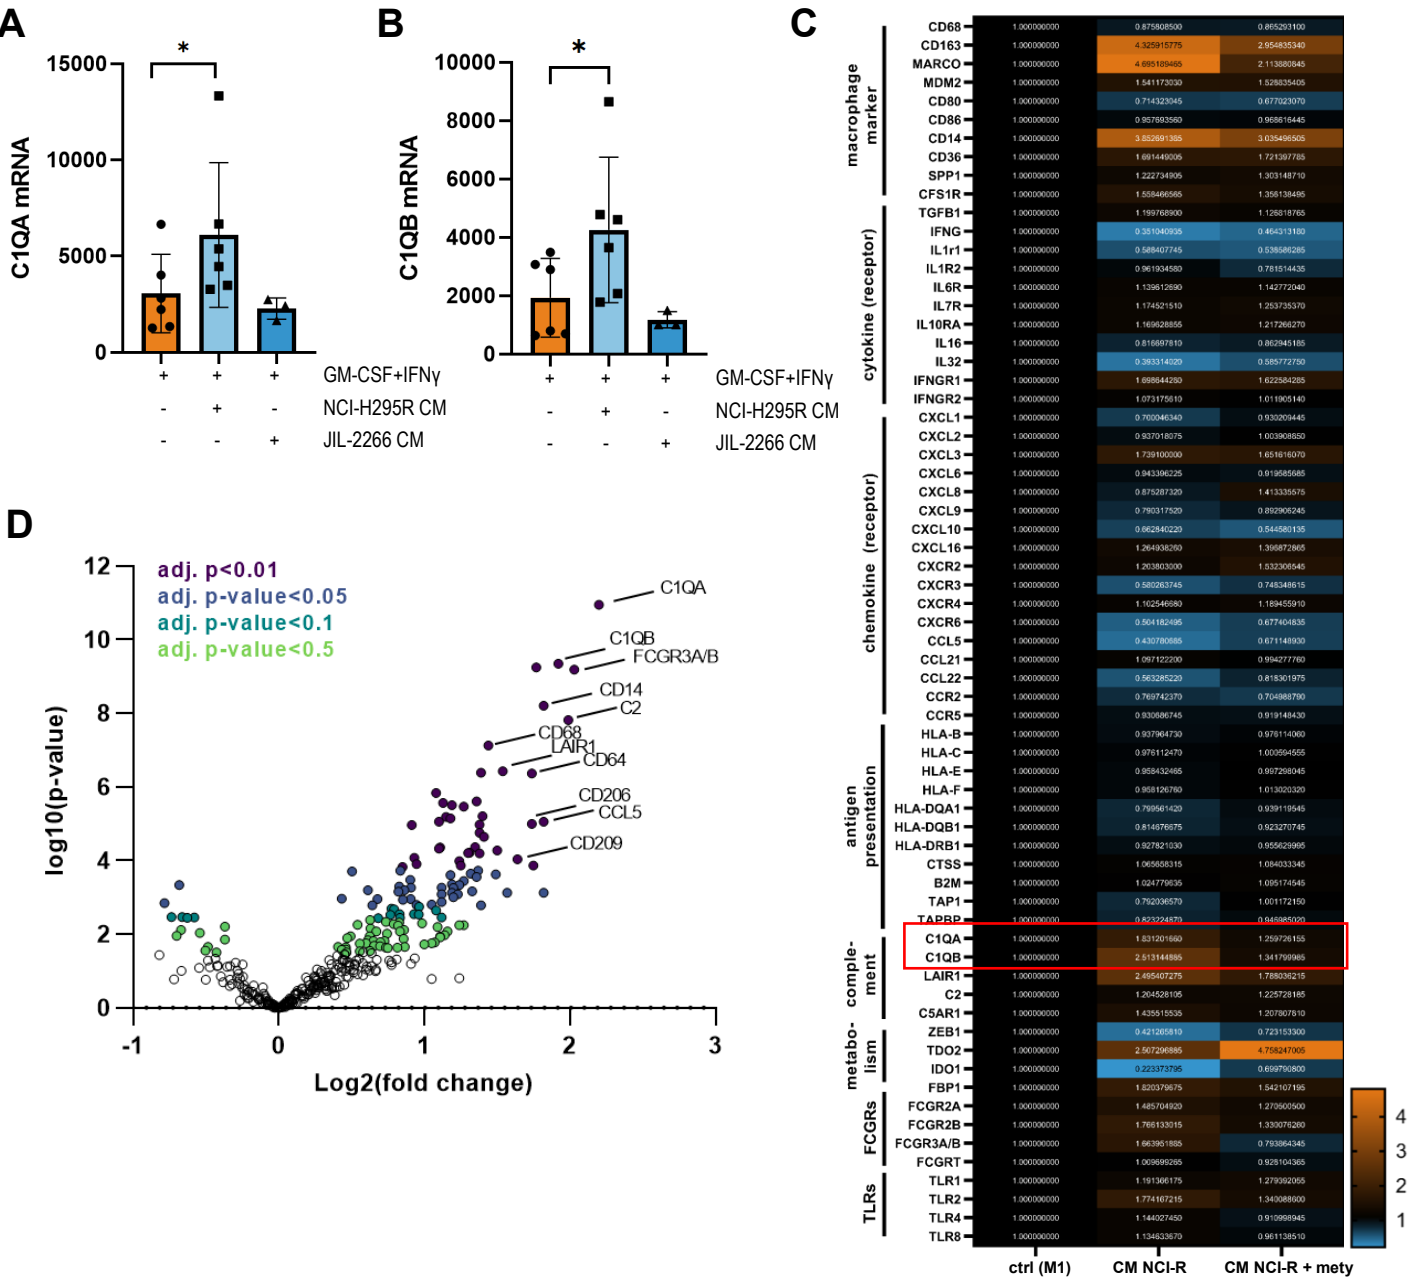

# Figure S5

**A**

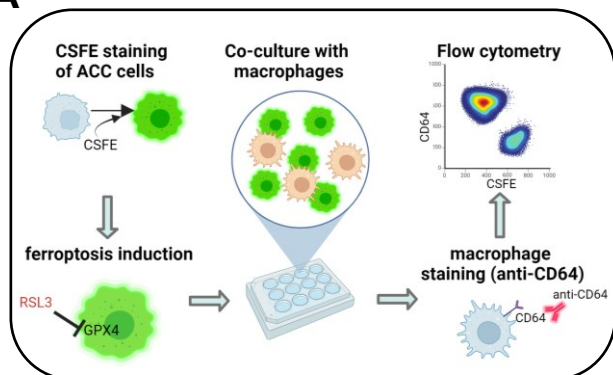

**B**

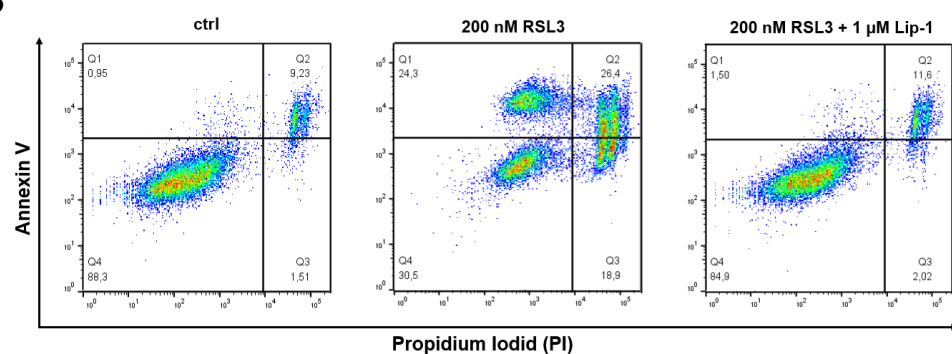

**C**

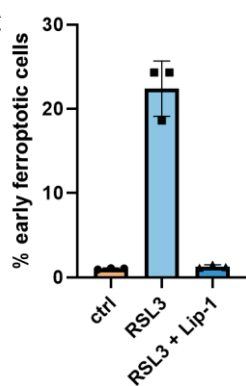

**D**

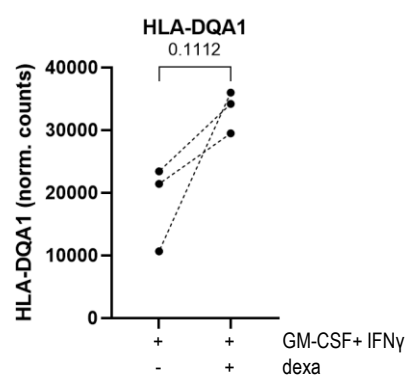

**E**

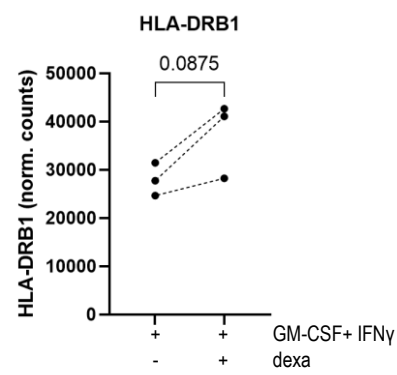

**F**

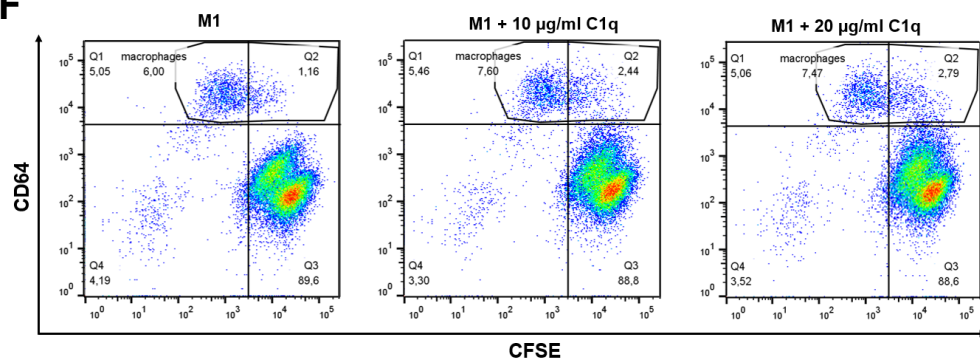

Figure S6

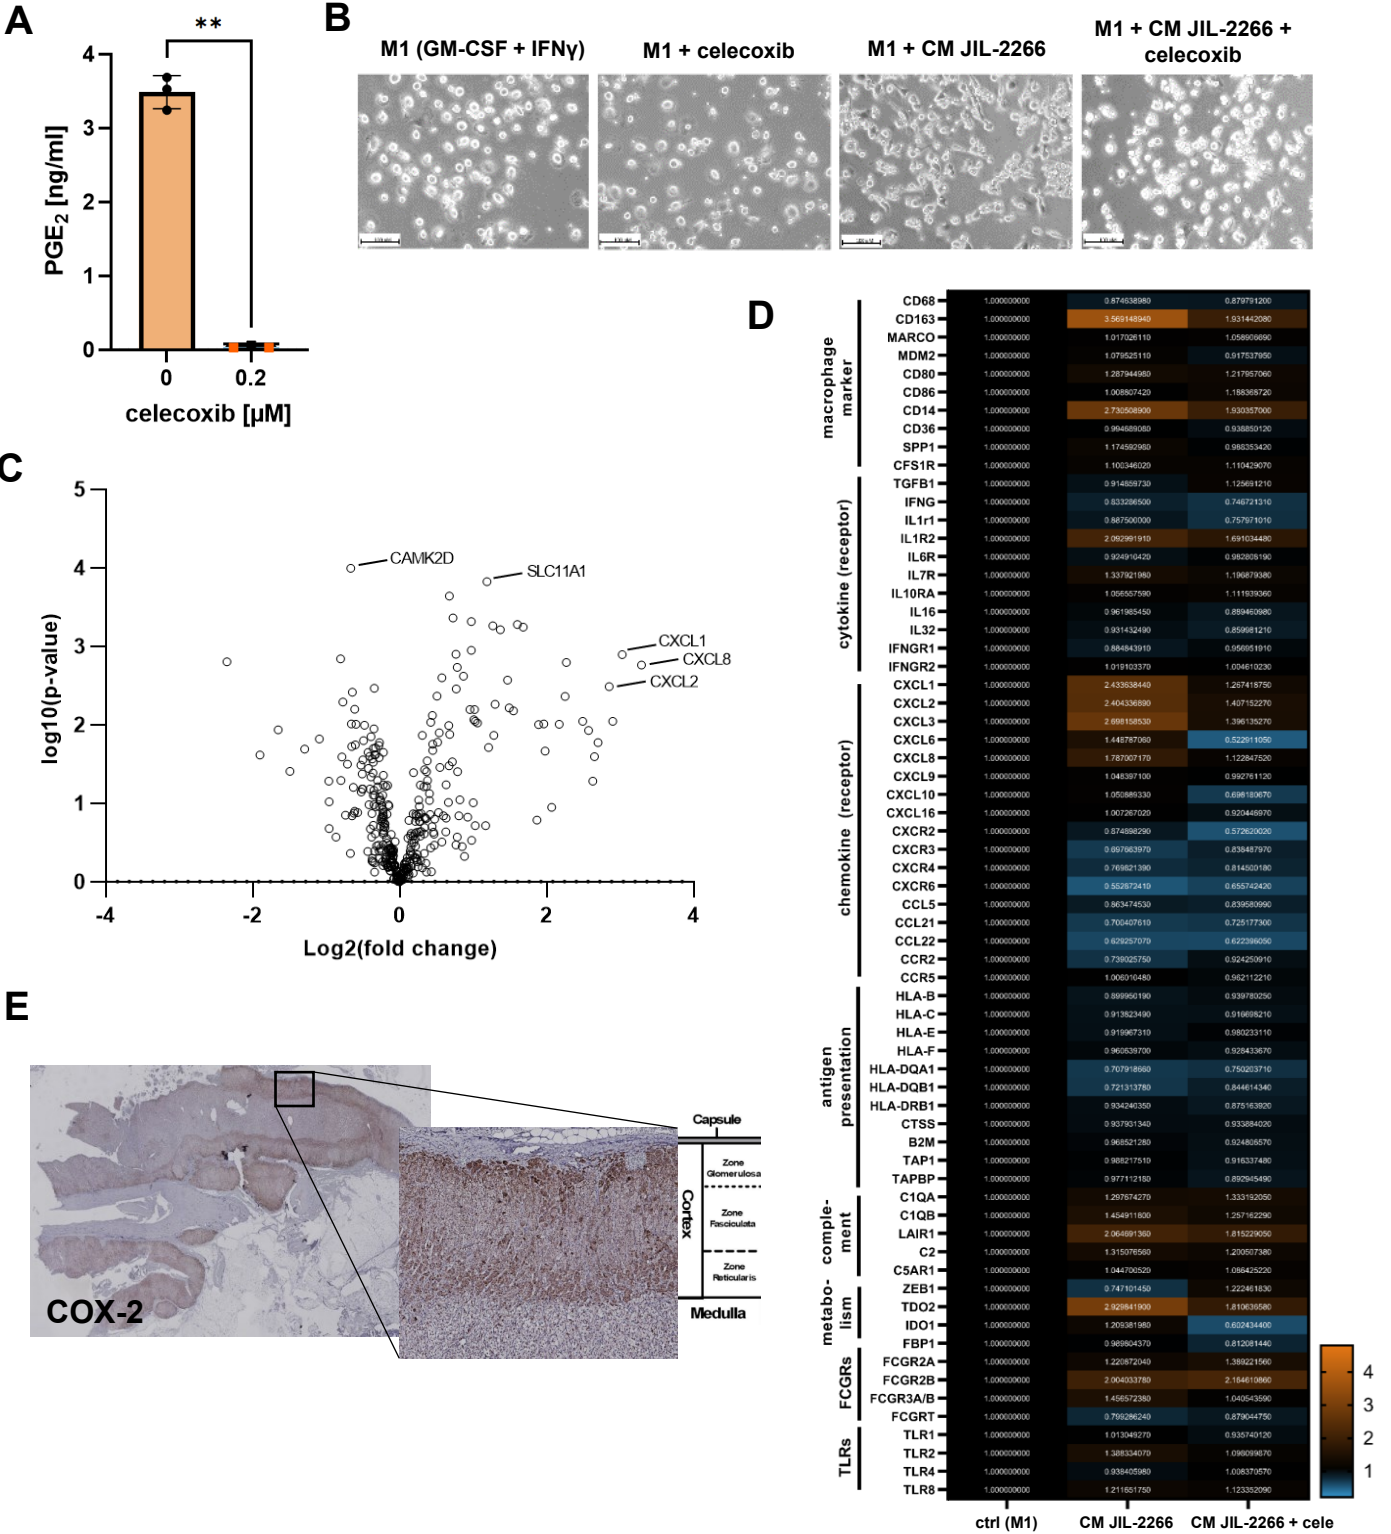



Figure S7

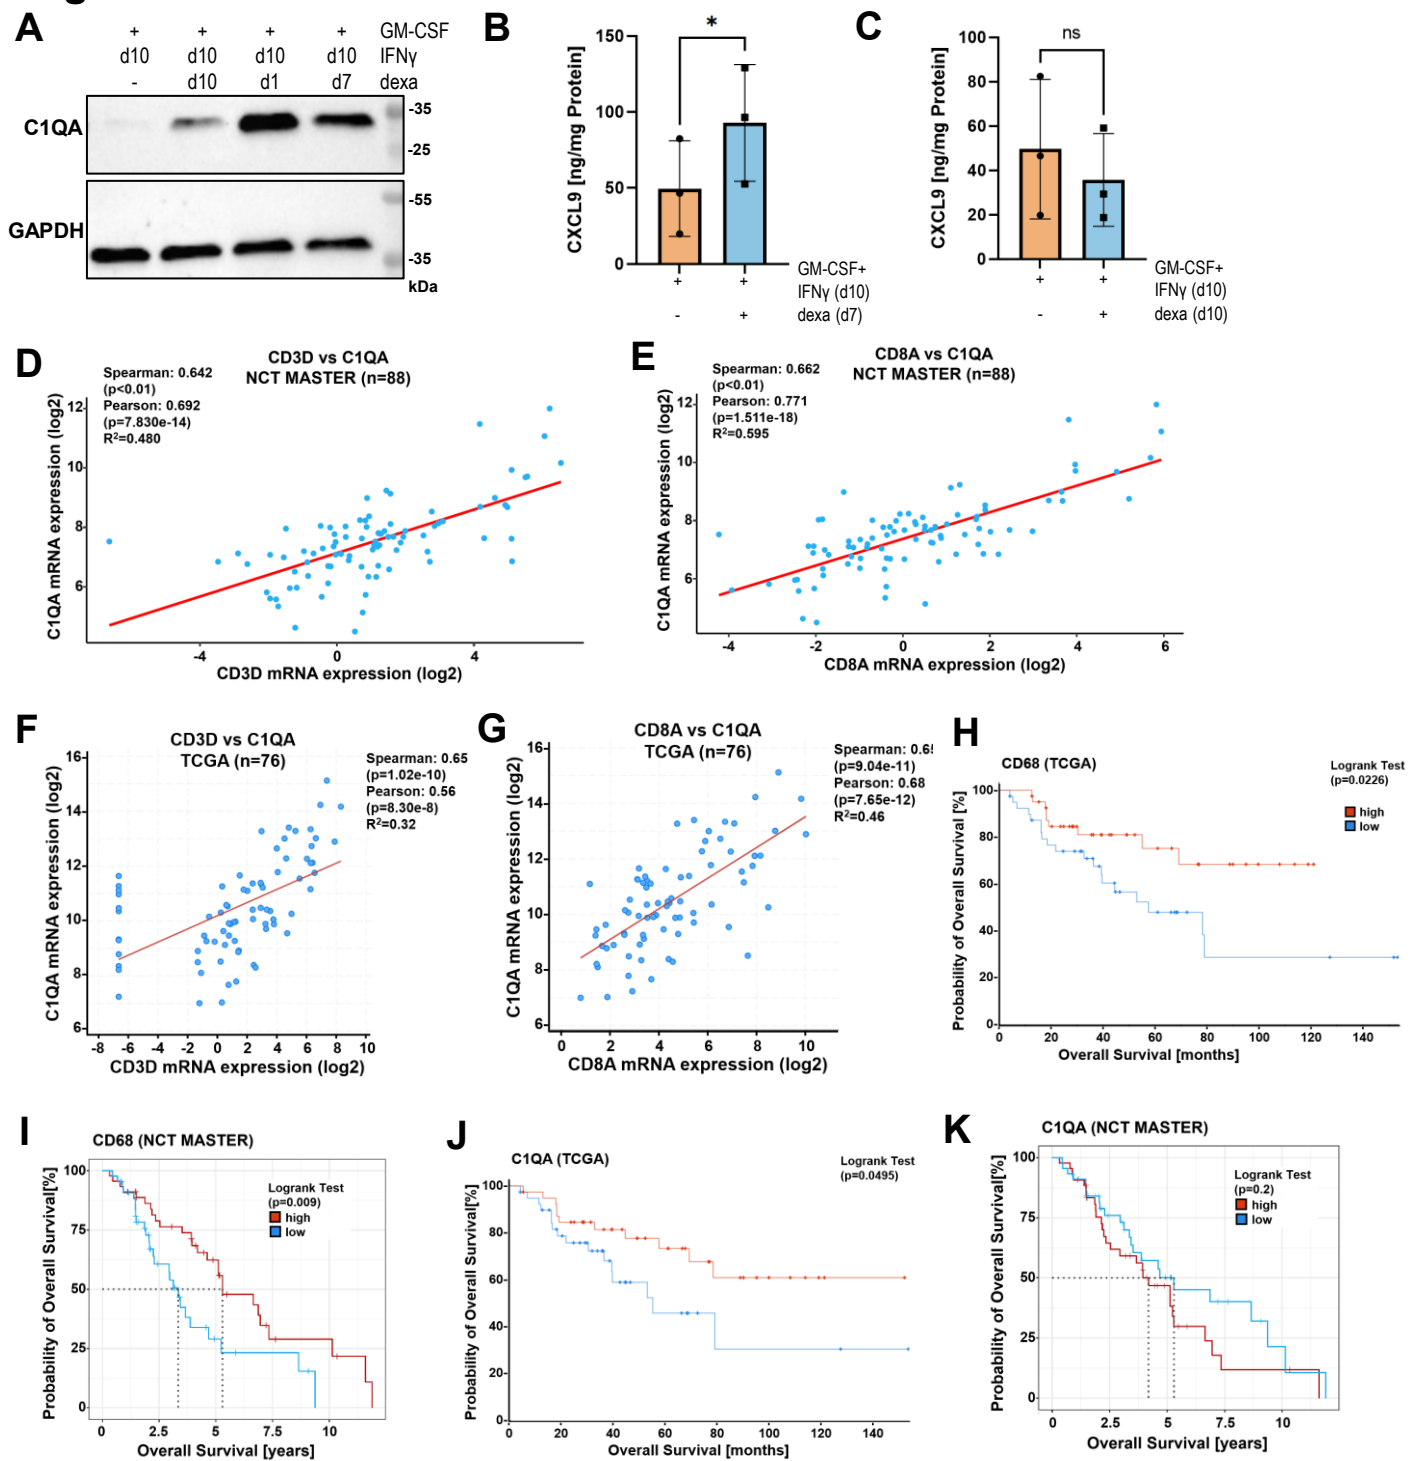

Figure S8

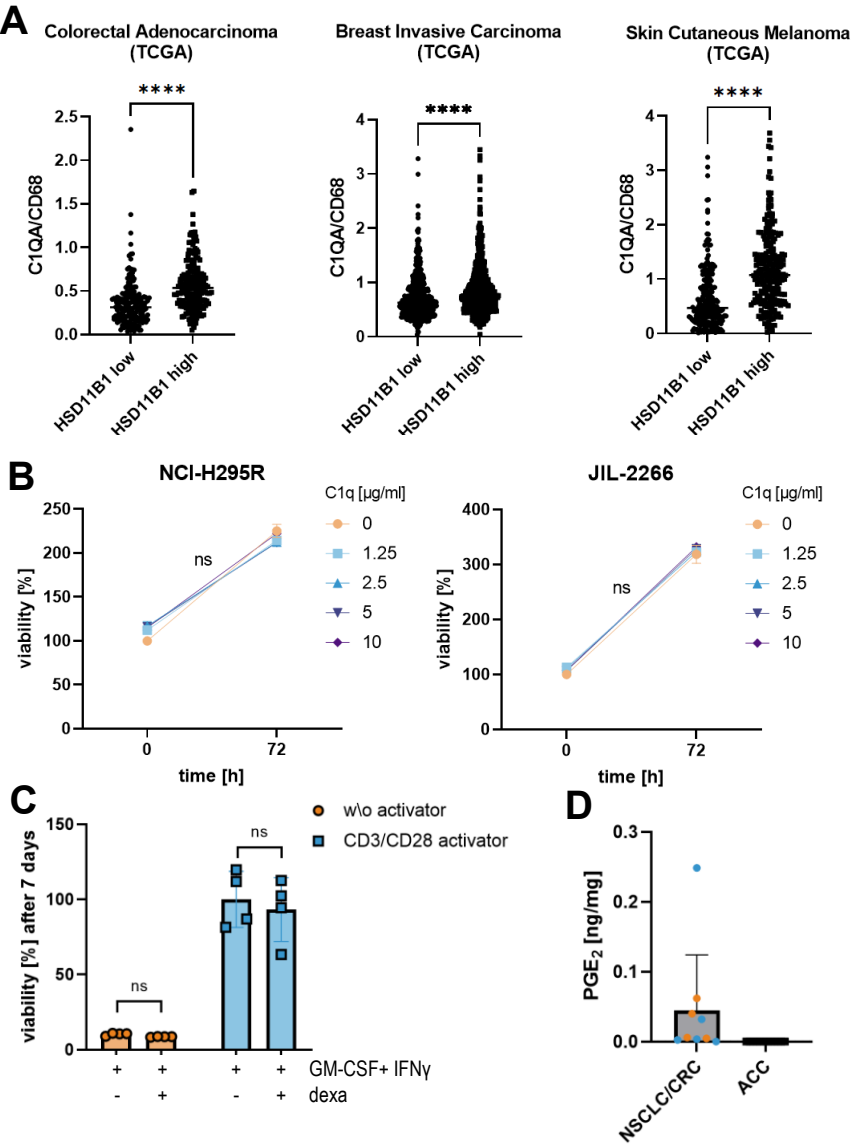

**Figure S1:** (A) Overview of the *in vitro* differentiation and polarization of primary human monocytes. Created in BioRender. Triebig, A. (2025) <https://BioRender.com/z16d389> (B) Morphology of differentiated and polarized MΦ by phase contrast microscopy according to the differentiation status indicated. Representative pictures are shown. Scale bar: 100 μm. (C) Expression of the MΦ marker CD64 and CD163 detected by immunofluorescence across the different MΦ phenotypes. (D) Expression of the “M2-like” macrophage marker CD163, CD206 according to differentiation status detected by western blot. (E) Extracellular acidification rate (ECAR) from metabolic flux assay of polarized MΦ. Representative graph is shown in Mean +/- SEM for technical replicates. (F) Quantified normalized ECAR values for glycolysis. N=3 biological replicates are shown in Mean +/- SD.

**Figure S2:** (A-C) Violin plots displaying the total tumoral expression of (A) *CD68*, (B) *CD163* and (C) *CD206* determined by Nanostring nCounter expression analysis in a total of 56 ACC tumors, stratified by clinical hormone excess; A=androgen excess; GC=glucocorticoid excess; GCA=glucocorticoid and androgen excess. Red dots represent medians, blue lines connect lower adjusted value and lower quartile and upper adjusted value and upper quartile, respectively. FDR adjusted p-values were calculated using the Nanostring nSolver software and Benjamin&Yekulti correction.

**Figure S3:** (A) Western blot of CD163 expression in MΦ after exposure to CM in the absence of exogenous growth factors. (B) Relative mRNA expression of *CSF1* in NCI-H295R and JIL-2266 cells measured by qPCR. (C) Total M-CSF in CM of NCI-H295R and JIL-2266 cells quantified by ELISA. (D) Total cortisol in supernatants of NCI-H295R after treatment with metyrapone (10 μM) or DMSO control. Cortisol was measured by a chemiluminescence immunoassay (DiaSorin; REF:313261). N=4 biological replicates. (E) Morphology of MΦ after exposure to NCI-H295R CM or control as indicated. Representative pictures are shown. Scale bar: 100 μm. CM=conditioned medium

**Figure S4:** (A-B) *CIQA* and (B) *CIQB* mRNA expression in MΦ exposed to CM of NCI-H295R (N=6), JIL-2266 (N=3) cells or control (N=6). Biological replicates are shown in Mean +/- SD. Statistical analysis was performed using paired t-test. (B) Heatmap of macrophage-related genes differentially expressed in MΦ after exposure to CM of NCI-H295R cells treated with 10 μM metyrapone or DMSO control. (C) Nanostring nCounter analysis of RNA isolated from 58 ACCs. Tumors were classified according to tumoral *CD163* expression into high and low expression; the median was used as cutoff. Adjusted p-values were calculated using Benjamin&Yekulti correction. CM=conditioned medium

**Figure S5:** (A) Schematic representation of phagocytosis assay. CSFE stained early ferroptotic ACC cells were co-cultured with MΦ overnight. MΦ were stained for CD64 and phagocytosis was analyzed by flow cytometry. Created in BioRender. Triebig, A. (2025) <https://BioRender.com/j94t809> (B) Representative flow cytometry plots and (C) quantification of AnnexinV+/PI- populations (early ferroptotic cells) after treatment with the ferroptosis inducer RSL3 (200 nM), co-treatment with RSL3 and Lip-1 (1 μM) or DMSO control. (D-E) RNA expression of the HLA class II genes (D) *HLA-DQA1* and (E) *HLA-DQRI* in MΦ exposed to dexamethasone or control. N=3 biological replicates are shown in Mean +/- SD. Statistical analysis was performed using paired t-test. (F) Representative flow cytometry plots of MΦ phagocytosis after exposure to different concentrations of purified human C1q. Dexa=dexamethasone

**Figure S6:** (A) Total PGE<sub>2</sub> in supernatants of JIL-2266 cells after treatment with 200 nM celecoxib or DMSO control after 48h detected by ELISA. For measurements below the limit of detection (LOD), values were substituted with LOD/2 and are plotted in red. (B) Morphology of MΦ after exposure to JIL-2266 CM or medium control as indicated. Representative pictures are shown. Scale bar: 100 μm. (C) Volcano plot showing DEGs in MΦ exposed to GM-CSF+IFNγ vs GM-CSF+IFNγ+PGE<sub>2</sub> (concentration of PGE<sub>2</sub>: 100 nM). Analysis of mRNA expression was performed with Nanostring nCounter. Adjusted significances were calculated using Benjamin&Yekulti correction. (D) Heatmap of macrophage-related genes differentially expressed in MΦ after exposure to CM of JIL-2266 cells treated with 200 nM celecoxib or DMSO control. (E) Immunohistochemical staining of a normal adrenal gland for COX-2. One representative image has been enlarged. Cele=celecoxib; CM=conditioned medium

**Figure S7:** (A) C1QA protein expression in MΦ treated with GM-CSF (day 1), IFNγ (day 10) and dexamethasone (100 nM; varying timepoints as indicated). (B) CXCL9 secretion by MΦ exposed to GM-CSF+IFNγ vs GM-CSF+IFNγ and dexamethasone (day 7). N=3 biological replicates are shown in Mean +/- SD. Statistical analysis was performed using paired t-test. (C) CXCL9 secretion by MΦ exposed to GM-CSF+IFNγ vs GM-CSF+IFNγ and dexamethasone (day 10). N=3 biological replicates are shown in Mean +/- SD. Statistical analysis was performed using paired t-test. (D-E) Correlation of *C1QA* and (D) *CD3D* or (E) *CD8A* expression in ACC tumours within the NCT MASTER dataset. N=88. (F-G) Correlation of *C1QA* and (F) *CD3D* or (G) *CD8A* expression in ACC tumours within the TCGA dataset. N=76. (H-I) Kaplan-Meier plots of OS according to *C1QA* expression in ACC tumors. Data was obtained from the (H) TCGA or (I) NCT MASTER dataset. (J-K) Kaplan-Meier plots of OS according to *C1QA* expression in ACC tumors. Data was obtained from the (J) TCGA or (K) NCT MASTER dataset. Dexa=dexamethasone

**Figure S8:** (A) *C1QA/CD68* gene expression ratio in Colorectal Adenocarcinoma, Breast Invasive Carcinoma and Skin Cutaneous Melanoma. Gene expression data was obtained from the TCGA dataset. Tumors were classified according to tumoral *HSD11B1* expression into high and low expression; the median was used as cutoff. Significances were calculated using Mann-Whitney-U-Test. (B) Viability of the ACC cell lines NCI-H295R and JIL-2266 after 48-hour treatment with different concentrations of human purified C1q or DMSO control. To test for effects of different C1q concentrations on cell growth, a two-way ANOVA was performed. (C) Viability of CD8<sup>+</sup> T cells after 7 days of culture in the CM of MΦ polarized with GM-CSF+IFNγ or GM-CSF+IFNγ+dexamethasone, respectively, with or without the addition of CD3/CD28 activator. N=4 biological replicates are shown in Mean +/- SD. Statistical analysis was performed using paired t-tests. (D) Total amount of PGE<sub>2</sub> measured in non-small lung cell carcinoma (NSCLC), colorectal carcinoma (CRC) and ACC tissue samples by LC-MS/MS. Anonymized NSCLC and CRC samples served as controls and were obtained from the Human Tissue and Cell Research (HTCR) foundation.
